# Supplementary material for: Diet induced the change of mtDNA copy number and metabolism in Angus cattle
Source: PubMed Central journal article supplement (PMC7372754; doi:10.1186/s40104-020-00482-x), 2020-07-21

**(A)****Muscle**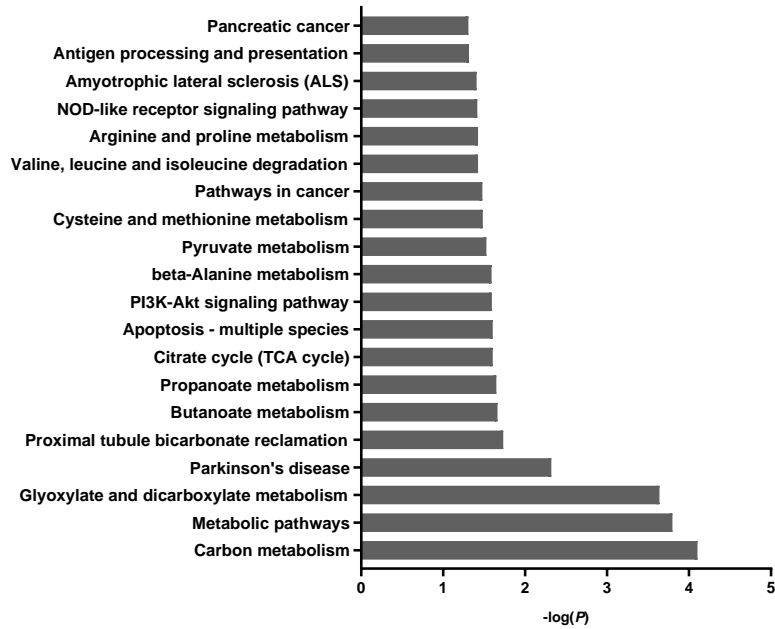**(B)****Liver**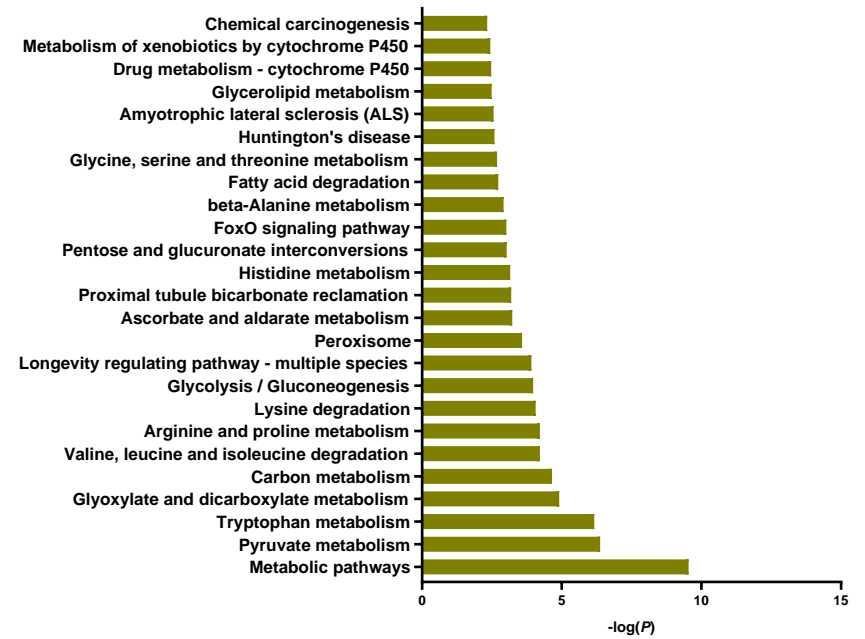**(C)****Spleen**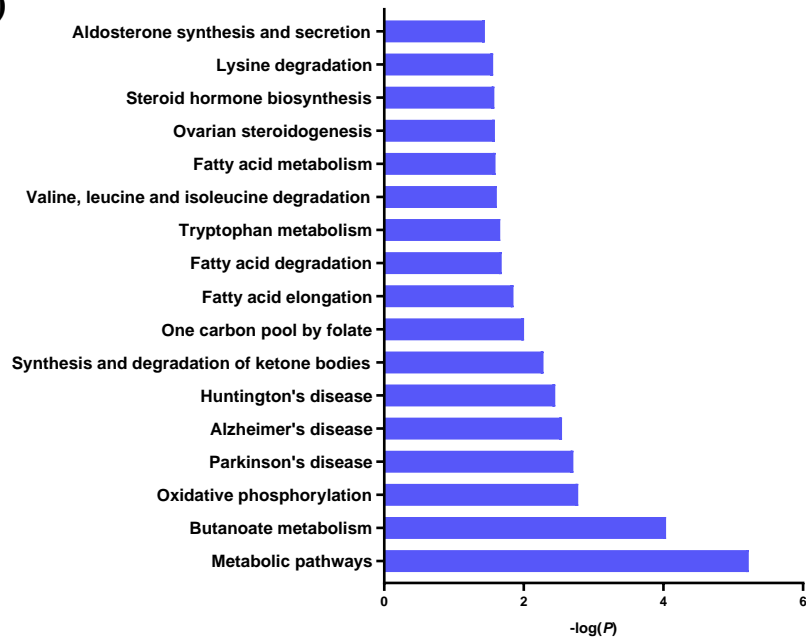**(D)****Rumen**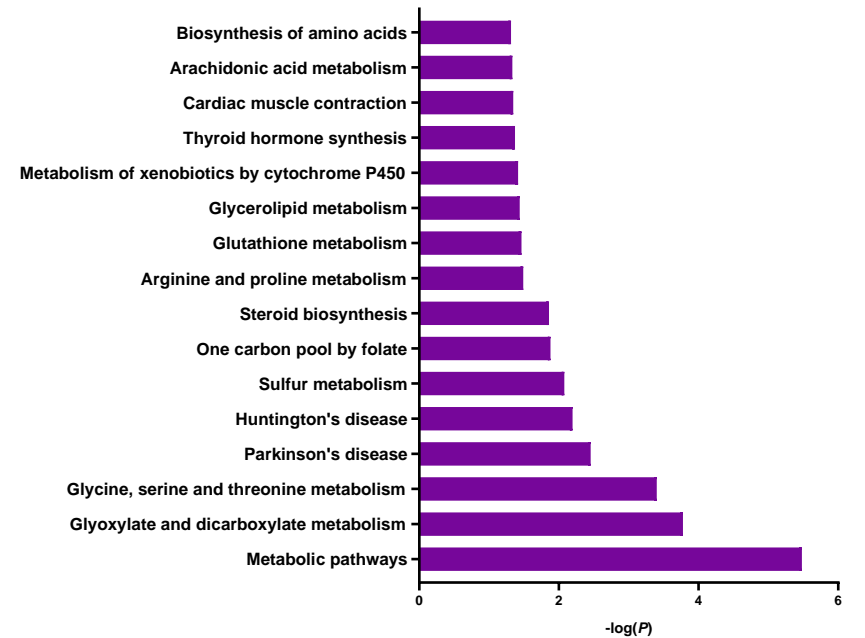

Supplement: 40104_2020_482_MOESM2_ESM.pdf [file 40104_2020_482_MOESM2_ESM.pdf]
